# Supplementary material for: Catalytic selective oxidation of aromatic amines to azoxy derivatives with an ultralow loading of peroxoniobate salts
Source: Royal Society of Chemistry journal article supplement (doi:10.1039/d2cy01137a), 2022-01-01
Supplement: d2cy01137a1.pdf [file d2cy01137a1.pdf]

*Supporting information*

**Catalytic Selective Oxidation of Aromatic Amines to Azoxy  
Derivatives with Ultralow Loading Peroxonioabate Salts**

Bingjie Ding<sup>†</sup>, Beibei Xu<sup>§</sup>, Zuoji Ding<sup>†</sup>, Tong Zhang<sup>†</sup>, Yajun Wang<sup>†</sup>, Hewen Qiu<sup>†</sup>, Jingjing He<sup>†</sup>,  
Pengfei An<sup>#</sup>, Yefeng Yao<sup>\*.§</sup>, Zhenshan Hou<sup>†,‡,\*</sup>

<sup>†</sup>Key Laboratory for Advanced Materials, Research Institute of Industrial Catalysis, School of Chemistry and Molecular Engineering, East China University of Science and Technology, Shanghai 200237, China.

<sup>§</sup>Physics Department and Shanghai Key Laboratory of Magnetic Resonance, East China Normal University, Shanghai 200062, China.

<sup>#</sup>Institute of High Energy Physics, Chinese Academy of Sciences, Beijing Synchrotron Radiation Facility (BSRF), Beijing 100049, China.

<sup>‡</sup>Shanghai Key Laboratory of Green Chemistry and Chemical Processes, East China Normal University, School of Chemistry and Molecular Engineering, Shanghai 200062, China.

\*Corresponding author. E-mail: houzhenshan@ecust.edu.cn; anpf@ihep.ac.cn, yfyao@phy.ecnu.edu.cn

## Experimental

### *Materials*

Niobium pentoxide ( $\text{Nb}_2\text{O}_5$ ), acetic acid and potassium hydroxide were obtained from Bide Pharmatech Ltd used to prepare niobic acid. Guanidine carbonate ( $\text{gu}_2\text{CO}_3$ ), ammonium hydroxide ( $\text{NH}_3\cdot\text{H}_2\text{O}$ ), tartaric acid ( $\text{H}_4\text{tart}$ ) and hydrogen peroxide (30 wt.%) were provided by Aladdin. Tetrabutylammonium hydroxide (TBAOH, 25 wt.% in  $\text{H}_2\text{O}$ ) and Tetraethylammonium hydroxide (TEAOH, 25 wt.% in  $\text{H}_2\text{O}$ ) were supplied by Bide Pharmatech Ltd. Aniline, N-phenylhydroxylamine and other aromatic amines were purchased from Shanghai Titan Scientific Co., Ltd. Ethanol was supplied by Sinopharm Chemical Reagent Co., Ltd. (Shanghai, People's Republic of China) as reaction solvent. Toluene was supplied by Shanghai Macklin Biochemical Co., Ltd utilized as internal standard in gas chromatography (GC) analysis. Acetonitrile (HPLC) was purchased from Shanghai Macklin Biochemical Co.

### *Catalyst preparation*

#### *Synthesis of $(\text{NH}_4)_3[\text{Nb}(\text{O}_2)_4]$*

$(\text{NH}_4)_3[\text{Nb}(\text{O}_2)_4]$  was a standard niobium-based complex which has been reported and can be easily synthesized according to previous literatures. At first, niobic acid ( $\text{Nb}_2\text{O}_5\cdot n\text{H}_2\text{O}$ ) was prepared according to previously described method.<sup>1</sup> Generally, solid KOH and  $\text{Nb}_2\text{O}_5$  was sintered at 550 °C for 6 h with a certain molar ratio ( $n_{(\text{KOH}/\text{Nb}_2\text{O}_5)}=10$ ) in a nickel crucible. Then the mixture was cooled and dissolved in water. The unreacted  $\text{Nb}_2\text{O}_5$  was separated by filtration and the filtrate was acetified with acetic acid, adjusting pH to 4 until lots of white precipitate was formed. The precipitate was washed with quantities of water to ensure that acetic acid was removed, which was then dried at 50 °C for 2 h. The water content was measured about 75% in niobic acid. The prepared niobic acid (2 mmol, 2.12 g) was dispersed in distilled water (1 mL). Subsequently, 8 mL of  $\text{H}_2\text{O}_2$  (30 wt.% in  $\text{H}_2\text{O}$ ) was added to the mixture and stirred for 0.5 h at 0 °C adjusting pH of the solution to 9-10 with  $\text{NH}_3\cdot\text{H}_2\text{O}$  until the solution became clear. Ethanol was immediately poured into the solution to generate white precipitate. Then, the precipitate can be collected by suction filtration and washed

with ethanol and dried by air. The resulted white precipitate was  $(\text{NH}_4)_3[\text{Nb}(\text{O}_2)_4]$ . Anal. Calcd for  $\text{H}_{12}\text{N}_3\text{NbO}_8$  (274.97): H, 4.36; N, 15.27; Nb, 33.82. Found: H, 4.35; N, 15.21; Nb, 33.75. Number of peroxide bonds: 3.6 per Nb atom.

*Synthesis of  $(\text{NH}_4)_6[\text{Nb}_2(\text{OH})_4(\text{O}_2)_2(\text{tart})_2]$  ( $(\text{NH}_4)_6\text{-Nb}$ )*

The Nb-based catalysts in this work were synthesized according to the following equation:

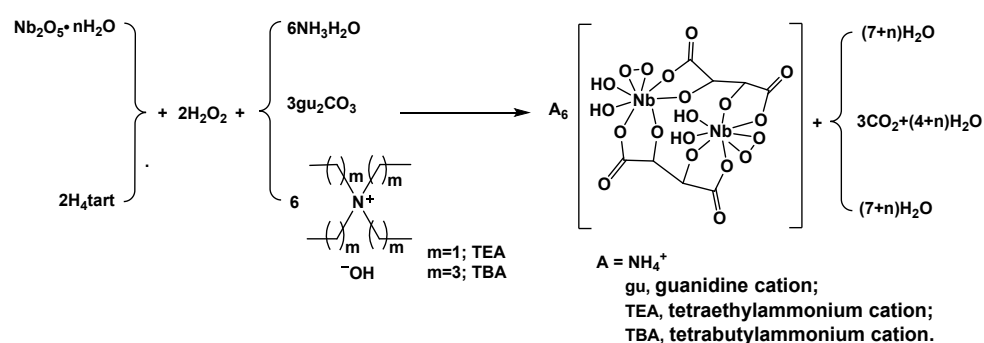

**Scheme S1** Synthetic route of Nb-based salts.

It can be seen that niobic acid was reacted with tartaric acid in the presence of  $\text{H}_2\text{O}_2$ , and then neutralized with base ( $\text{NH}_3 \cdot \text{H}_2\text{O}$ ,  $\text{gu}_2\text{CO}_3$ , TEAOH, TBAOH) can afford the corresponding the salts of peroxoniobate anion.

At first, the niobic acid (1 mmol, 1.06 g) was dispersed in distilled water (1 mL). Subsequently, 5 mL of  $\text{H}_2\text{O}_2$  (30 wt.% in  $\text{H}_2\text{O}$ ) was added to the mixture and stirred for 0.5 h at 0 °C until the mixture became clear. Tartaric acid (2 mmol, 0.3g) was added to the clear solution and stirred for 1 h.  $\text{NH}_3 \cdot \text{H}_2\text{O}$  was added to promote the coordination of tartaric acid and niobium center until that the pH was about 10. Ethanol was immediately poured into the solution to generate white precipitate. Then, the precipitate can be collected by suction filtration and washed with ethanol and dried by air. The resulted white precipitate was  $(\text{NH}_4)_6[\text{Nb}_2(\text{OH})_4(\text{O}_2)_2(\text{tart})_2]$ . Anal. Calcd for  $\text{C}_8\text{H}_{32}\text{N}_6\text{Nb}_2\text{O}_{20}$  (717.98): C, 13.37; H, 4.46; N, 11.70; Nb, 25.91. Found: C, 13.31; H, 4.49; N, 11.68; Nb, 25.86. Number of peroxide bonds: 0.8 per Nb atom.

*Synthesis of TBA<sub>6</sub>[Nb<sub>2</sub>(OH)<sub>4</sub>(O<sub>2</sub>)<sub>2</sub>(tart)<sub>2</sub>] (TBA<sub>6</sub>-Nb)*

The prepared niobic acid (1 mmol, 1.06 g) was dispersed in distilled water (1 mL). Subsequently, 5 mL of H<sub>2</sub>O<sub>2</sub> (30 wt.% in H<sub>2</sub>O) was added to the mixture and stirred for 0.5 h at 0 °C until the mixture became clear. Tartaric acid (2 mmol, 0.3g) was added to the clear solution and stirred for 1 h. Then 6 mmol of TBAOH (25 wt.% in H<sub>2</sub>O) was added to the solution to benefit coordination of tartaric acid with niobium and the solution was stirred for another 3 h. Finally, the solution was dried vacuum to remove solvent and red-brown viscous liquid was obtained. <sup>1</sup>H NMR (600 MHz, D<sub>2</sub>O): δ 0.80 (t, 17.73 H), 1.20 (m, 11.83 H), 1.49 (m, 11.86 H), 3.04 (t, 11.59 H), 3.19 (s, 1H), <sup>13</sup>C NMR (150 MHz, D<sub>2</sub>O): δ 13.15, 18.75, 22.97, 58.06, 73.47, 178.25 (Fig. S2). Anal. Calcd for C<sub>104</sub>H<sub>224</sub>N<sub>6</sub>Nb<sub>2</sub>O<sub>20</sub> (2063.48): C, 60.48; H, 10.86; N, 4.07; Nb, 9.01. Found: C, 60.35; H, 11.08; N, 3.98; Nb, 8.85. Number of peroxide bonds: 0.9 per Nb atom.

*Synthesis of TEA<sub>6</sub>[Nb<sub>2</sub>(OH)<sub>4</sub>(O<sub>2</sub>)<sub>2</sub>(tart)<sub>2</sub>] (TEA<sub>6</sub>-Nb)*

The TEA<sub>6</sub>[Nb<sub>2</sub>(OH)<sub>4</sub>(O<sub>2</sub>)<sub>2</sub>(tart)<sub>2</sub>] was synthesized by a similar procedure but with TEAOH. Briefly, 1 mmol niobic acid in 1 mL of H<sub>2</sub>O was stirred with 5 mL H<sub>2</sub>O<sub>2</sub> (30 wt.% in H<sub>2</sub>O) for 0.5 h. Then tartaric acid (2 mmol, 0.3g) was added and stirred for 1 h. Whereafter, 6 mmol of TEAOH (25 wt.% in H<sub>2</sub>O) was added to the mixture and stirred for 3 h. Finally, the solution was dried vacuum to remove solvent and light-yellow viscous liquid was attained. <sup>1</sup>H NMR (600 MHz, D<sub>2</sub>O): δ 1.13 (t, 18.12 H), 3.12 (q, 12.01 H), 3.22 (s, 1H), <sup>13</sup>C NMR (150 MHz, D<sub>2</sub>O): δ 7.56, 52.50, 74.57, 178.67 (Fig. S3). Anal. Calcd for C<sub>56</sub>H<sub>128</sub>N<sub>6</sub>Nb<sub>2</sub>O<sub>20</sub> (1390.73): C, 48.32; H, 9.20; N, 6.04; Nb, 13.37. Found: C, 48.21; H, 9.31; N, 5.96; Nb, 13.15. Number of peroxide bonds: 0.8 per Nb atom.

*Synthesis of gu<sub>6</sub>[Nb<sub>2</sub>(OH)<sub>4</sub>(O<sub>2</sub>)<sub>2</sub>(tart)<sub>2</sub>] (gu<sub>6</sub>-Nb)*

The gu<sub>6</sub>[Nb<sub>2</sub>(OH)<sub>4</sub>(O<sub>2</sub>)<sub>2</sub>(tart)<sub>2</sub>] was synthesized according to a similar method of TBA<sub>6</sub>[Nb<sub>2</sub>(OH)<sub>4</sub>(O<sub>2</sub>)<sub>2</sub>(tart)<sub>2</sub>] except for replacement of TBAOH with gu<sub>2</sub>CO<sub>3</sub>. Generally, 1 mmol niobic acid in 1 mL of H<sub>2</sub>O was stirred with 5 mL H<sub>2</sub>O<sub>2</sub> (30 wt.% in H<sub>2</sub>O) for 0.5 h. Then tartaric acid (2 mmol, 0.3g) was added and stirred for 1 h. Then,

3 mmol of  $\text{gu}_2\text{CO}_3$  was added to the mixture and stirred for 3 h. Finally, the solution was dried vacuum to remove solvent and white viscous liquid was attained. Anal. Calcd for  $\text{C}_{14}\text{H}_{44}\text{N}_{18}\text{Nb}_2\text{O}_{20}$  (970.11): C, 17.32; H, 4.54; N, 25.98; Nb, 19.17. Found: C, 17.15; H, 4.66; N, 25.75; Nb, 18.98. Number of peroxide bonds: 0.8 per Nb atom.

#### *Catalyst characterization*

The catalysts were characterized detailed by various techniques such as FT-IR spectra, Elemental analysis, ICP-AES,  $^{93}\text{Nb}$  NMR, TGA, ESI-MS, UV-vis and EXAFS. FT-IR spectra were recorded on a Nicolet Magna 550 FT-IR spectrometer. The elemental analysis of C, H and N were recorded using an Elementar Vario EI III CHNOS elemental analyzer and the ICP-AES analysis of Nb was recorded by a Varian 710 instrument respectively.  $^{93}\text{Nb}$  NMR spectra were recorded at ambient temperature by a Varian 700 MHz spectrometer in  $\text{D}_2\text{O}$  working at 171.05 MHz with  $\text{NbCl}_6^-\text{N}(\text{Et})_4^+$  as the reference. A PerkinElmer Pyris Diamond were utilized for TGA measurements. The samples were dried under vacuum at 60 °C for 2 h prior to TGA. The samples were heated from 50 to 800 °C (heating rate: 10 °C  $\text{min}^{-1}$ ) under the flow of anhydrous air (flow rate: 20 mL  $\text{min}^{-1}$ ). High-resolution electrospray ionization mass spectrometry (HR ESI-MS) was operated on a micrOTOF II spectrometer with  $\text{CH}_3\text{CN}$  as solvent. The UV-vis spectra were measured with a Varian Cary 500 UV/Vis spectrophotometer. Extended X-ray absorption fine structure (EXAFS) analysis was conducted at the beamline 1W1B of the Beijing Synchrotron Radiation Facility (BSRF), Institute of High Energy Physics (IHEP), Chinese Academy of Sciences (CAS).

#### *Catalytic oxidation test*

The selective oxidation of aromatic amines was performed in liquid phase with a 50 mL Schlenk flask equipped with a magnetic stirrer. In a typical experiment, 10 mmol arylamines, 15 mmol  $\text{H}_2\text{O}_2$ ,  $7.8 \times 10^{-3}$  mol% of Nb-based salt and toluene (an internal standard) were dissolved in 10 mL ethanol at 30 °C. The reaction solution was withdrawn periodically for analysis using gas chromatography (GC). The N-phenylhydroxylamine and 4-aminophenol cannot detectable by GC and thus were

detected by a high-performance liquid chromatography (WuFen LC100) equipped with an ultraviolet detector. A SilGreen GH0515046C18A column (150 mm × 4.6 mm) was utilized for product separation with acetonitrile and H<sub>2</sub>O ( $v_{\text{acetonitrile}}/v_{\text{H}_2\text{O}}=7/3$ ) as the mobile phase at a flow rate of 0.5 mL min<sup>-1</sup>. All the reaction products were recrystallized from ethanol and verified by HPLC and NMR spectra.

$$\text{Conversion} = \frac{\text{moles}_{\text{aniline. init}} - \text{moles}_{\text{aniline. end}}}{\text{moles}_{\text{aniline. init}}} \times 100\%$$

where  $\text{moles}_{\text{aniline. init}}$  represented the molar amount of aniline prior to reaction while  $\text{moles}_{\text{aniline. end}}$  denoted that of aniline after after a set reaction time.

$$\text{Yield} = \frac{n \times \text{moles of products } x}{\text{moles}_{\text{aniline. init}}} \times 100\%$$

(n=1 for N-phenylhydroxyamine, nitrosobenzene and nitrobenzene, n=2 for azoxybenzene).

$$\text{TOF} = \frac{\text{moles}_{\text{aniline converted}} (\text{mol})}{\text{moles}_{\text{Nb}} (\text{mol}) \times \text{reaction time} (\text{h})} \text{ (at initial conversion } < 20\%)$$

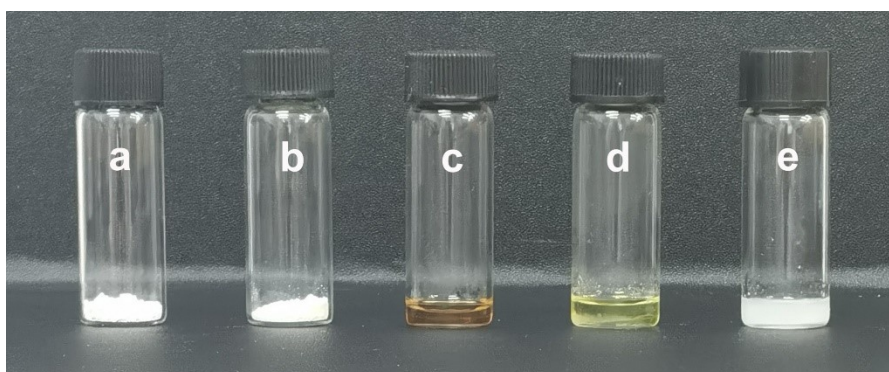

Fig. S1 Photographs of a)  $(\text{NH}_4)[\text{Nb}(\text{O}_2)_4]$ , b)  $(\text{NH}_4)_6\text{-Nb}$ , c)  $\text{TBA}_6\text{-Nb}$ , d)  $\text{TEA}_6\text{-Nb}$ , e)  $\text{gu}_6\text{-Nb}$  under room temperature.

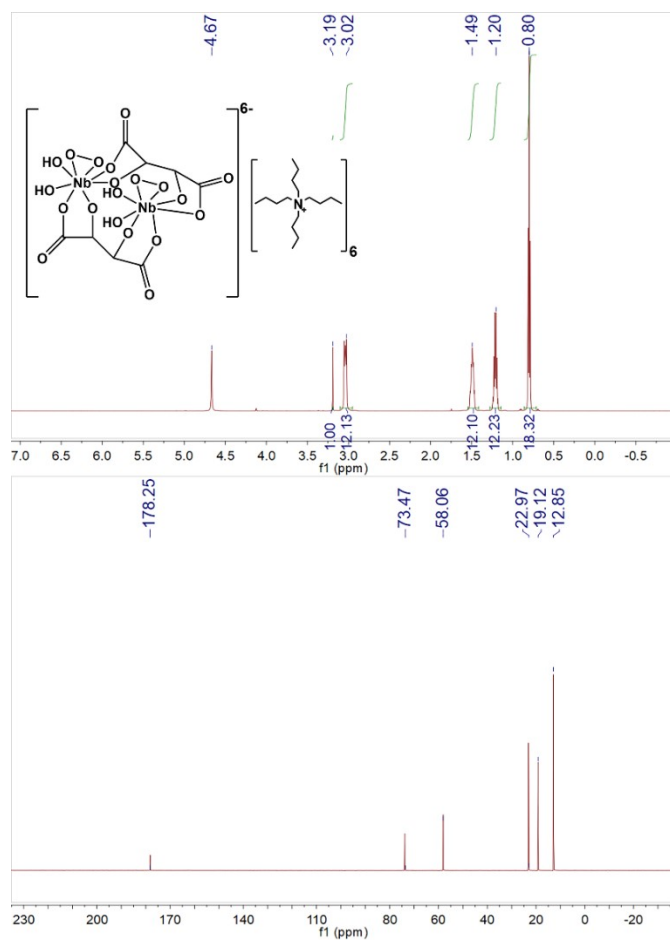

Fig. S2 <sup>1</sup>H NMR and <sup>13</sup>C NMR of TBA<sub>6</sub>-Nb in D<sub>2</sub>O.



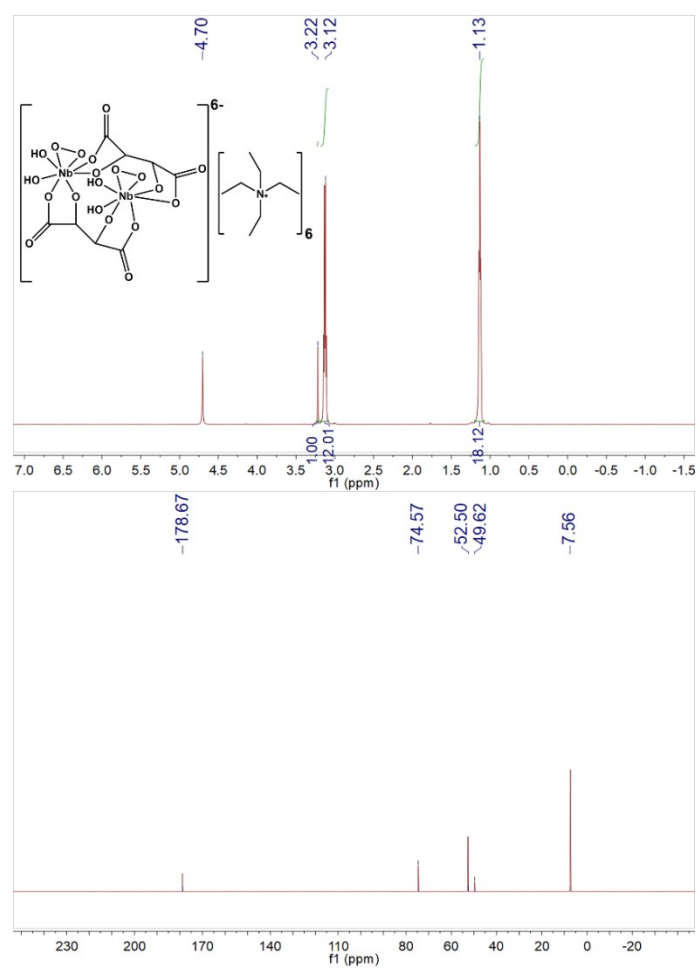

Fig. S3 <sup>1</sup>H NMR and <sup>13</sup>C NMR of TEA<sub>6</sub>-Nb in D<sub>2</sub>O.

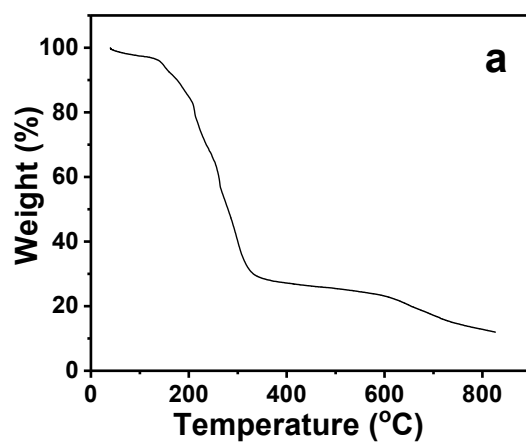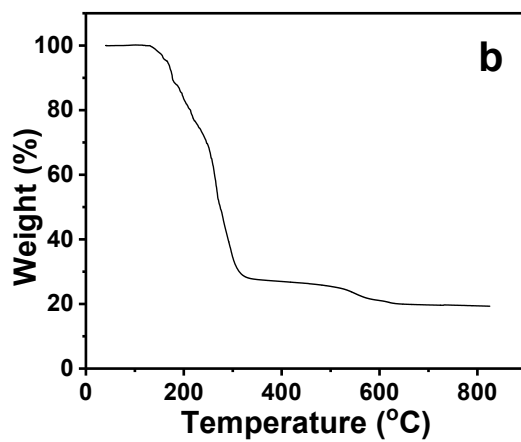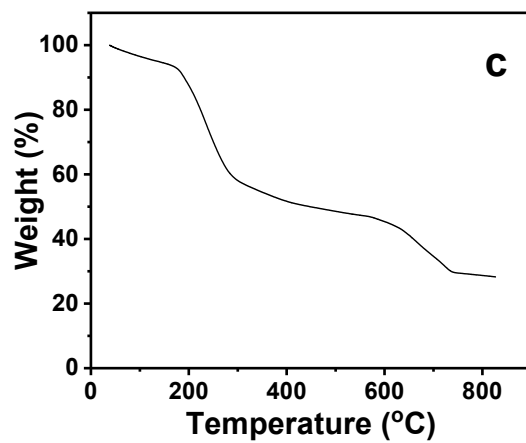

Fig. S4 TGA patterns of a) TBA<sub>6</sub>-Nb; b) TEA<sub>6</sub>-Nb; c) gu<sub>6</sub>-Nb.

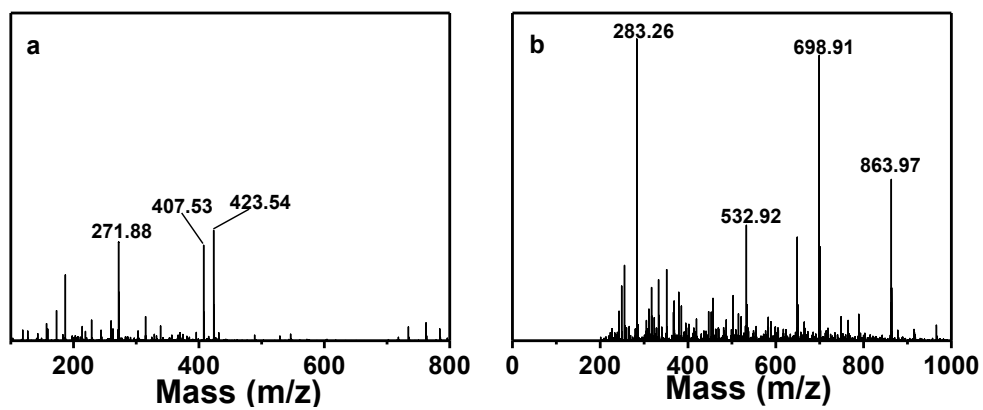

Fig. S5 ESI-MS of a) TBA<sub>6</sub>-Nb; b) gu<sub>6</sub>-Nb.

Table S1 The identification of anion species in CH<sub>3</sub>CN solution of TBA<sub>6</sub>-Nb.

| Entry | Mass (m/z) | Formula                                                                                                   | Possible structure                                                                    |
|-------|------------|-----------------------------------------------------------------------------------------------------------|---------------------------------------------------------------------------------------|
| 1     | 271.88     | [Nb <sub>2</sub> O(O <sub>2</sub> )(OH)(tart) <sub>2</sub> ] <sup>2-</sup>                                | 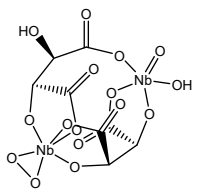  |
| 2     | 407.53     | [Nb <sub>3</sub> (O <sub>2</sub> ) <sub>2</sub> O <sub>2</sub> (tart) <sub>2</sub> (Htart)] <sup>2-</sup> |  |
| 3     | 423.54     | [Nb <sub>3</sub> (O <sub>2</sub> ) <sub>4</sub> (tart) <sub>2</sub> (Htart)] <sup>2-</sup>                |   |

Table S2 The identification of anion species in CH<sub>3</sub>CN solution of gu<sub>6</sub>-Nb.

| Entry | Mass (m/z) | Formula                                                                                                 | Possible anion structure                                                              |
|-------|------------|---------------------------------------------------------------------------------------------------------|---------------------------------------------------------------------------------------|
| 1     | 283.26     | $\{(\text{gu})(\text{CH}_3\text{CN})[\text{Nb}_2\text{O}(\text{OH})_5(\text{O}_2)(\text{tart})]\}^{2-}$ | 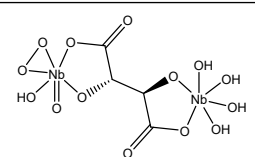  |
| 2     | 532.92     | $\{(\text{gu})(\text{CH}_3\text{CN})[\text{Nb}_2\text{O}_2(\text{OH})_4(\text{tart})]\}^-$              |  |
| 3     | 698.91     | $[(\text{gu})_2\text{Nb}_2(\text{OH})_3(\text{O}_2)(\text{tart})_2(\text{H}_2\text{O})]^-$              |  |
| 4     | 863.97     | $\{(\text{gu})_4\text{H}[\text{Nb}_2(\text{O}_2)_4(\text{H}_2\text{O})(\text{tart})_2]\}^-$             |  |

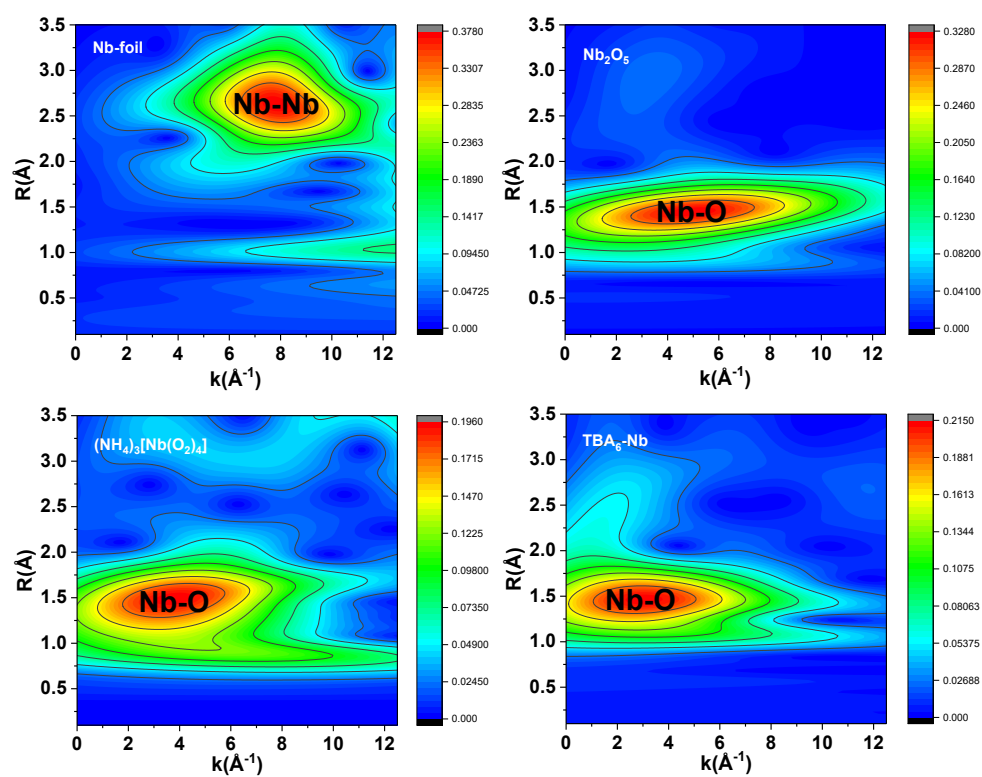

Fig. S6 Experimental 2D WT EXAFS plots for  $x(k)$  EXAFS data of Nb foil,  $\text{Nb}_2\text{O}_5$ ,  $(\text{NH}_4)_3[\text{Nb}(\text{O}_2)_4]$  and  $\text{TBA}_6\text{-Nb}$ .

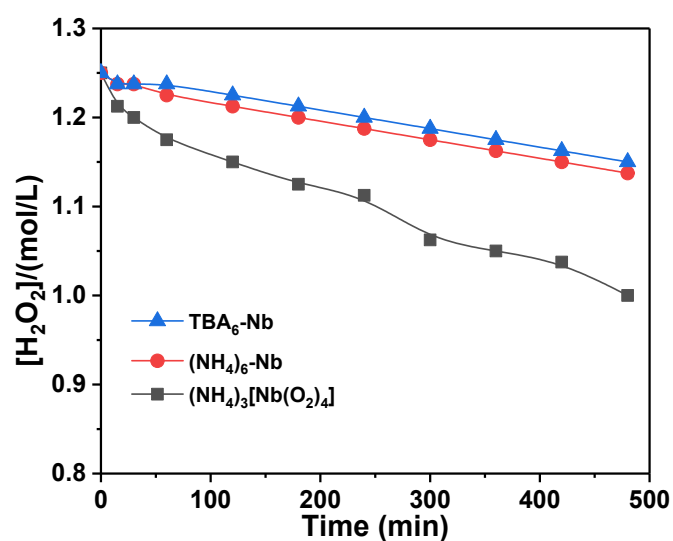

Fig. S7 Dependence of  $H_2O_2$  concentration  $[H_2O_2]$  in ethanol on time in the presence of the different catalysts. Conditions:  $H_2O_2$  (15 mmol, 30 wt%), ethanol (10 mL),  $T = 30\text{ }^\circ\text{C}$ . The residual amount of  $H_2O_2$  was measured by potential difference titration of  $Ce^{3+}/Ce^{4+}$ .

Table S3 Oxidative coupling of aniline to azoxybenzene in different solvents<sup>a</sup>.

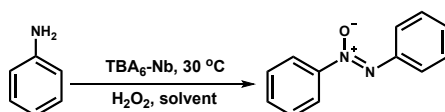

| Entries | Solvents         | Con. (%) <sup>b</sup> | Sel. (%)     |                     |
|---------|------------------|-----------------------|--------------|---------------------|
|         |                  |                       | Azoxybenzene | Others <sup>c</sup> |
| 1       | None             | 5                     | 51           | 49                  |
| 2       | H <sub>2</sub> O | 2                     | 1            | -                   |
| 3       | dichloromethane  | 1                     | 1            | -                   |
| 4       | acetonitrile     | 94                    | 93           | 7                   |
| 5       | acetone          | 91                    | 96           | 4                   |
| 6       | methanol         | 98                    | 97           | 3                   |
| 7       | ethanol          | 98                    | 97           | 3                   |

<sup>a</sup>Reaction conditions: 10 mmol aniline, 10 mL solvent,  $7.8 \times 10^{-3}$  mol% TBA<sub>6</sub>-Nb, 1.5 equiv H<sub>2</sub>O<sub>2</sub>, 30 °C, 5 h. <sup>b</sup>GC conversion with toluene as an internal standard. <sup>c</sup>Others include nitrosobenzene, nitrobenzene, N-phenylhydroxylamine and 4-aminophenol.



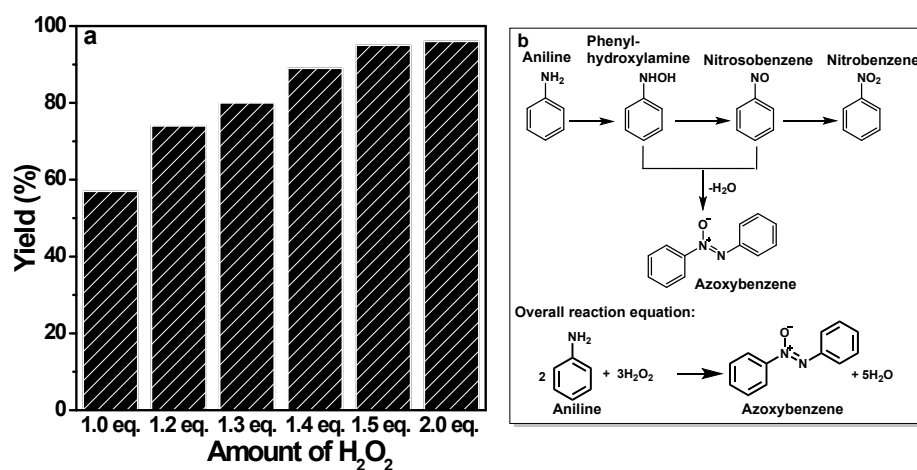

Fig. S8 a) Effect of the molar ratio of H<sub>2</sub>O<sub>2</sub> to aniline on yield of azoxybenzene. Reaction conditions: 10 mmol aniline, 10 mL ethanol, TBA<sub>6</sub>-Nb (7.8×10<sup>-3</sup> mol%), 30 °C, 5 h. b) Reaction pathways for the synthesis of azoxybenzene through the oxidation of aniline

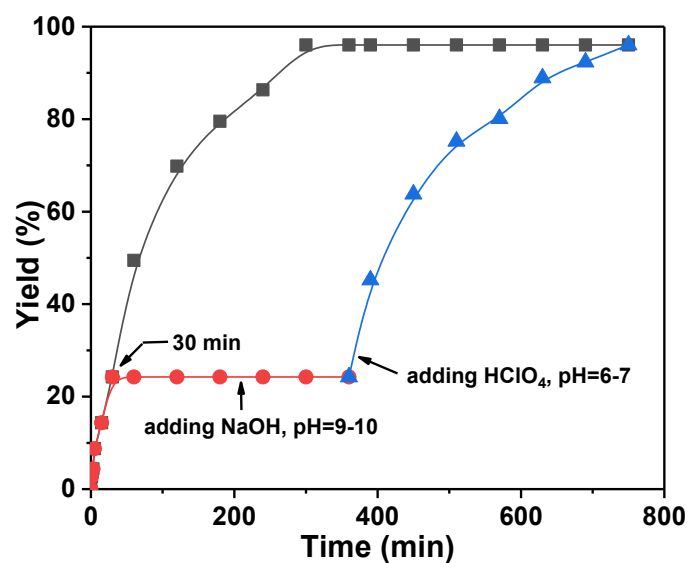

Fig. S9 Time profile of the oxidative coupling of aniline in the presence of different additives adjusting the pH of the solution. Reaction conditions: 10 mmol aniline, 10 mL ethanol,  $7.8 \times 10^{-3}$  mol% TBA<sub>6</sub>-Nb, 1.5 equiv H<sub>2</sub>O<sub>2</sub>, 30 °C. After reaction for 30min, the reaction solution was equally divided into two parts. One part was continued to stir for reaction (black line) and another part was added by NaOH solution until the pH of the solution was adjusted to pH=9-10 (red line). Subsequently, HClO<sub>4</sub> was added to the part and the pH was adjusted again from 9-10 to 6-7 (blue line).

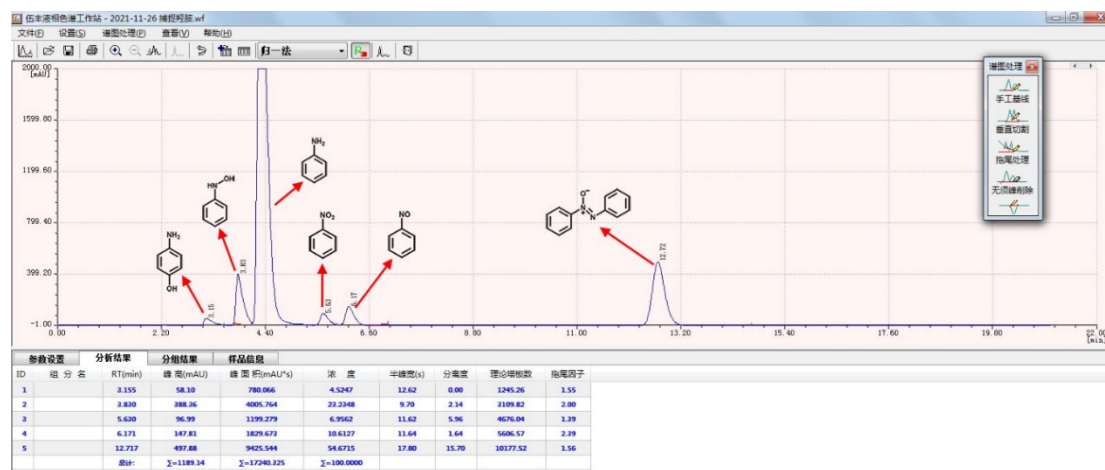

Fig. S10 HPLC chromatogram of the initial reaction solution. Reaction conditions: 10 mmol aniline, 10 mL ethanol, 1.5 equiv H<sub>2</sub>O<sub>2</sub>, 7.8×10<sup>-3</sup> mol% TBA<sub>6</sub>-Nb, -5 °C, 15 min.

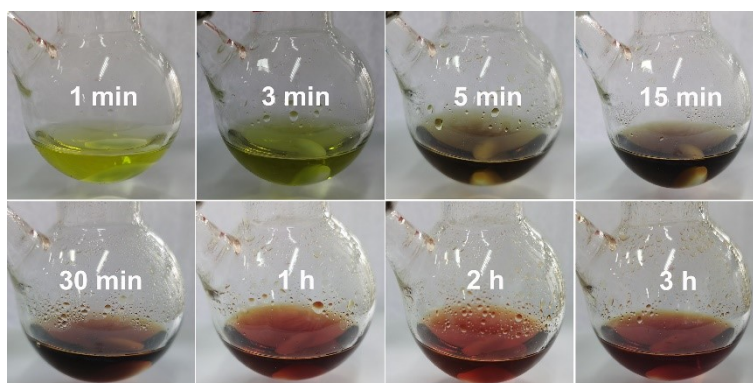

Fig. S11 The color of aniline oxidation solution varies with time. Reaction conditions: 10 mmol aniline, 10 mL ethanol,  $7.8 \times 10^{-3}$  mol% TBA<sub>6</sub>-Nb, 1.5 equiv H<sub>2</sub>O<sub>2</sub>, 30 °C.

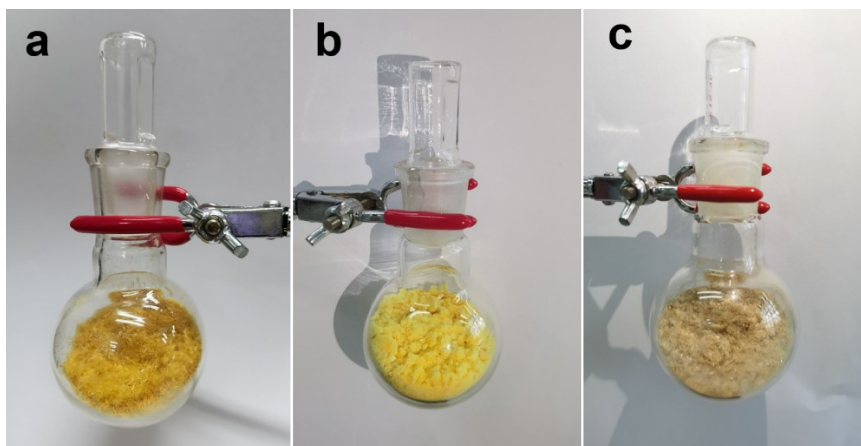

Fig. S12 Crystalline products of a) Azoxybenzene; b) 4,4'-Azoxytoluene; c) 4,4'-Azoxychlorobenzene in a large-scale study (*ca.* 10 g).

Table S4 Comparison of the TBA<sub>6</sub>-Nb with the previous reports in the oxidative coupling of aniline to azoxybenzene.

| Catalyst                                            | Aniline<br>:H <sub>2</sub> O <sub>2</sub> | t (°C) | Solvent          | Yield <sup>a</sup><br>(%) | TOF<br>(h <sup>-1</sup> ) | Ref.      |
|-----------------------------------------------------|-------------------------------------------|--------|------------------|---------------------------|---------------------------|-----------|
| TiO <sub>2</sub>                                    | 1:3                                       | 50     | Methanol         | 98                        | 2.3                       | 2         |
| P25                                                 | 1:1.7                                     | 60     | -                | 51                        | 50                        | 3         |
| TS-1                                                | 1:0.8                                     | 70     | t-Butanol        | 20                        | 1.2                       | 4         |
| Ti-MCM-48                                           | 1:3                                       | 50     | Methanol         | 90                        | 2.0                       | 5         |
| Ti-Beta                                             | 1:0.2                                     | 70     | Acetonitrile     | 8                         | 0.2                       | 6         |
| Co-Si-oxide                                         | 1:2                                       | 80     | Acetonitrile     | 99                        | 16                        | 7         |
| CuCr <sub>2</sub> O <sub>4</sub>                    | 1:5                                       | 70     | 1,4-Dioxane      | 72                        | 0.7                       | 8         |
| Ag-WO <sub>3</sub>                                  | 1:3                                       | RT     | Acetonitrile     | 79                        | 0.3                       | 9         |
| Cu-CeO <sub>2</sub>                                 | 1:3                                       | 50     | Acetonitrile     | 87                        | 1.4                       | 10        |
| Nb-Zn-Al-oxide <sup>c</sup>                         | 1:2                                       | RT     | Methanol         | 90                        | 0.2                       | 11        |
| TBA <sub>2</sub> [Mo <sub>6</sub> O <sub>19</sub> ] | 1:2                                       | 50     | MTBE             | 93                        | 12                        | 12        |
| Zr(OH) <sub>4</sub>                                 | 1:3                                       | RT     | H <sub>2</sub> O | 92                        | 10                        | 13        |
| NbOOH-FeOOH                                         | 1:11                                      | RT     | Propanol         | 80                        | 0.3                       | 14        |
| Nb <sub>2</sub> O <sub>5</sub> -scCO <sub>2</sub>   | 1:1.4                                     | RT     | Ethanol          | 79                        | 305                       | 15        |
| TBA <sub>6</sub> -Nb                                | 1:1.5                                     | RT     | Ethanol          | 97                        | 4358                      | This work |

<sup>a</sup>Refer to yield of azoxybenzene

**Azoxybenzene:** Crude product was purified by recrystallization from ethanol.  $^1\text{H}$  NMR (400 MHz,  $\text{CDCl}_3$ )  $\delta$  7.37-7.41 (m 1H), 7.47-7.58 (m, 5H), 8.11-8.21 (d, 2H), 8.25-8.35 (d, 2H);  $^{13}\text{C}$  NMR (100 MHz,  $\text{CDCl}_3$ )  $\delta$  122.39, 125.58, 128.75, 128.84, 129.66, 131.63, 144.05, 148.39. HPLC analysis conditions: mobile phase:  $V_{\text{acetonitrile}}/V_{\text{H}_2\text{O}} = 7/3$ ; flow rate:  $0.5 \text{ mL min}^{-1}$ .

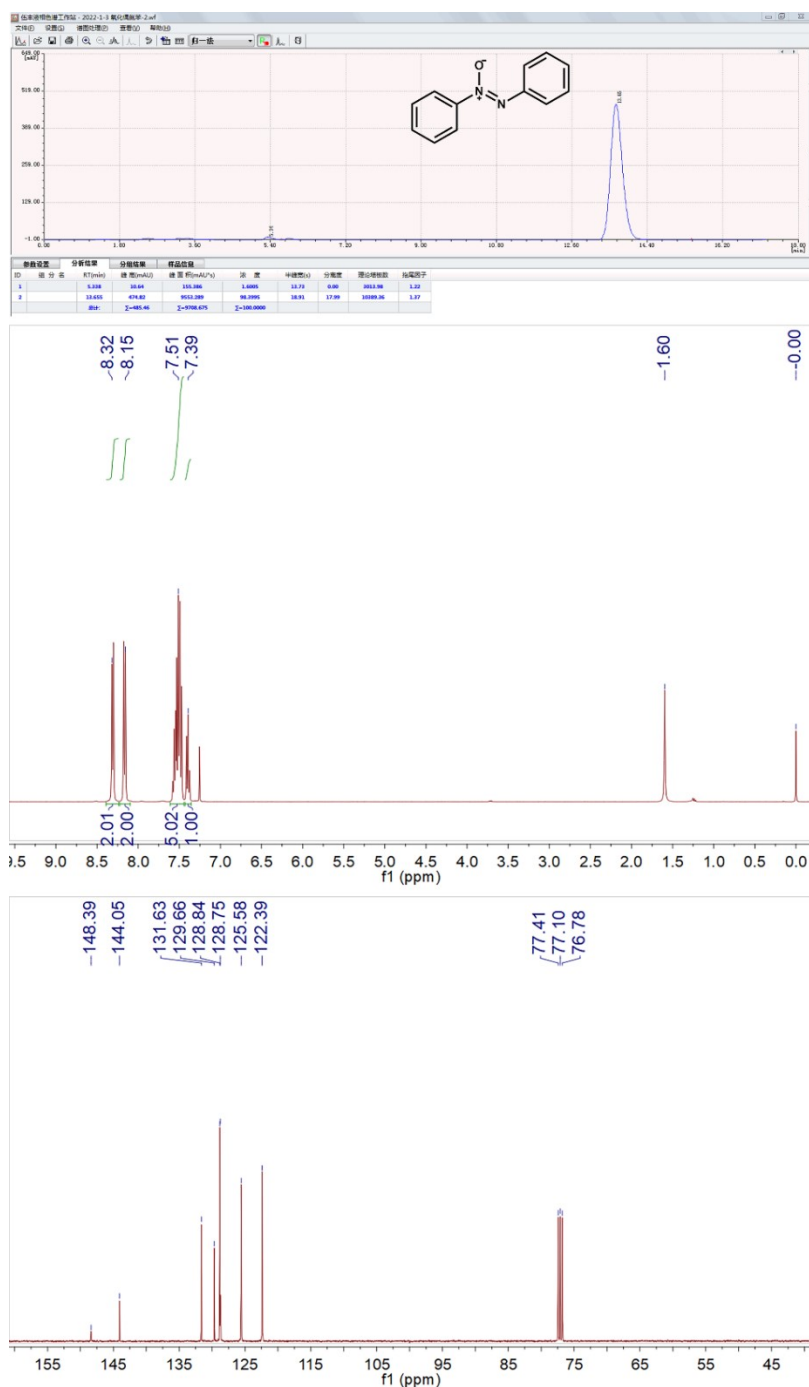

Fig. S13 HPLC chromatogram  $^1\text{H}$  NMR and  $^{13}\text{C}$  NMR spectra of azoxybenzene.

**2,2'-Azoxytoluene:** Crude product was purified by recrystallization from ethanol. <sup>1</sup>H NMR (400 MHz, CDCl<sub>3</sub>) δ 2.37 (s, 3H), 2.51 (s, 3H), 7.21-7.31 (m, 5H), 7.36 (m, 1H), 7.67 (d, 1H), 8.03 (d, 1H); <sup>13</sup>C NMR (100 MHz, CDCl<sub>3</sub>) δ 18.45, 18.54, 121.59, 123.62, 126.11, 126.64, 128.64, 130.07, 130.83, 131.24, 131.83, 134.16, 142.82, 149.49. HPLC analysis conditions: mobile phase: V<sub>acetonitrile</sub>/V<sub>H<sub>2</sub>O</sub>) =7/3; flow rate: 0.5 mL min<sup>-1</sup>.

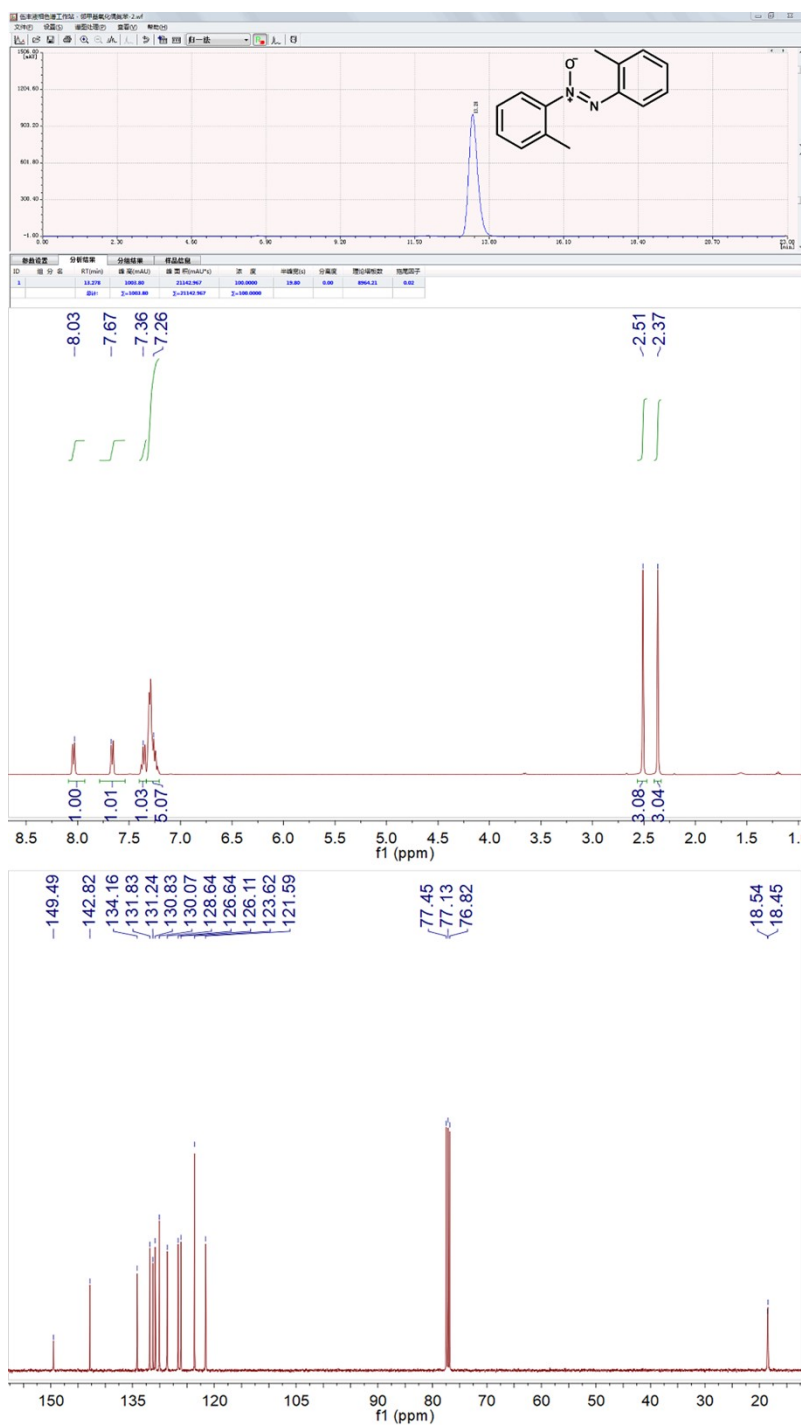

Fig. S14 HPLC chromatogram, <sup>1</sup>H NMR and <sup>13</sup>C NMR spectra of 2,2'-azoxytoluene.



**2,2'-Azoxychlorobenzene:** Crude product was purified by recrystallization from ethanol.  $^1\text{H}$  NMR (400 MHz,  $\text{CDCl}_3$ )  $\delta$  7.30 (m, 1H), 7.35-7.46 (m, 3H), 7.51-7.54 (m, 2H), 7.74 (m, 1H), 7.99 (m, 1H);  $^{13}\text{C}$  NMR (100 MHz,  $\text{CDCl}_3$ )  $\delta$  123.41, 125.21, 126.82, 127.10, 127.64, 129.65, 129.77, 130.32, 131.09, 131.23, 140.86, 147.27. HPLC analysis conditions: mobile phase: acetonitrile; flow rate: 0.5  $\text{mL min}^{-1}$ .

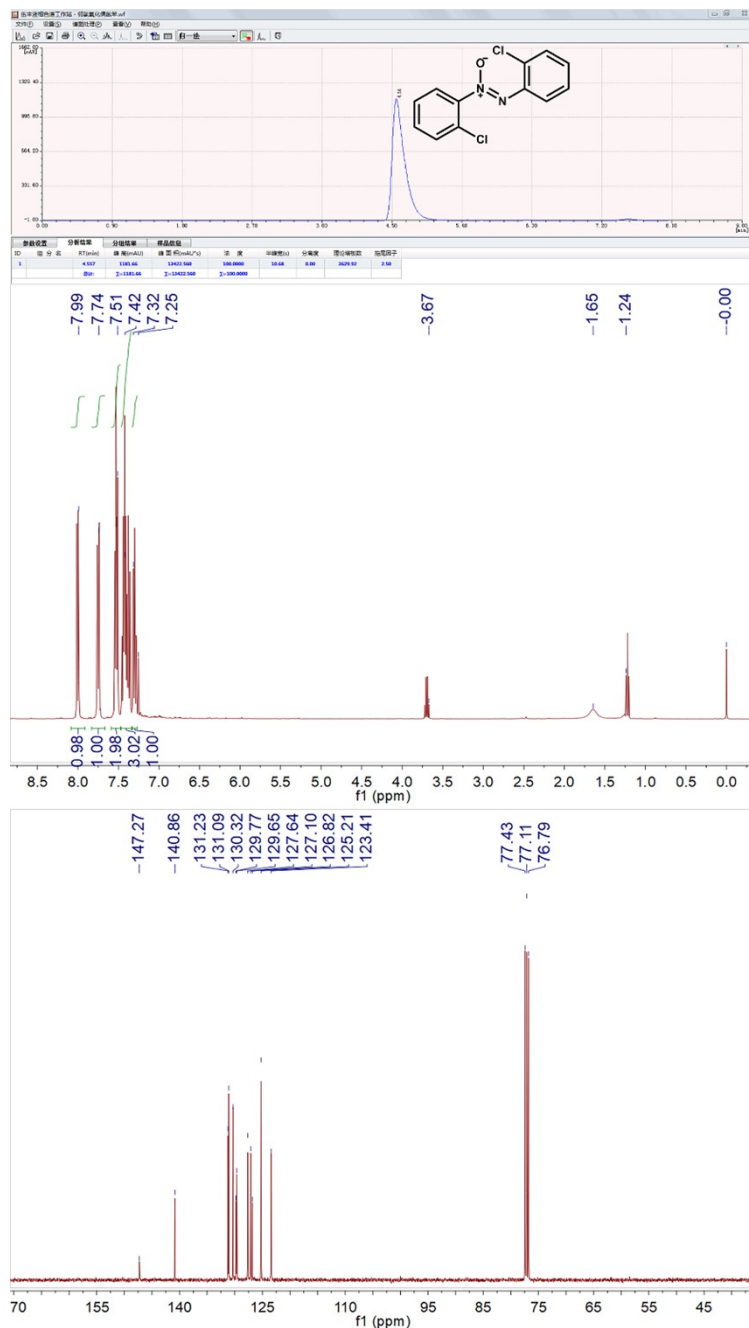

Fig. S15 HPLC chromatogram,  $^1\text{H}$  NMR and  $^{13}\text{C}$  NMR spectra of 2,2'-Azoxychlorobenzene.

**2,2'-Azoxyanisole:** Crude product was purified by recrystallization from ethanol.  $^1\text{H}$  NMR (400 MHz,  $\text{CDCl}_3$ )  $\delta$  3.89 (s, 3H), 3.90 (s, 3H), 6.99-7.10 (m, 4H), 7.32 (t, 1H), 7.40 (t, 1H), 7.62 (d, 1H), 8.11 (d, 1H);  $^{13}\text{C}$  NMR (100 MHz,  $\text{CDCl}_3$ )  $\delta$  56.01, 56.34, 111.73, 113.03, 120.29, 120.48, 123.16, 124.82, 129.83, 131.12, 133.52, 139.73, 151.92, 153.47. HPLC analysis conditions: mobile phase:  $V_{\text{acetonitrile}}/V_{\text{H}_2\text{O}} = 7/3$ ; flow rate:  $0.5 \text{ mL min}^{-1}$ .

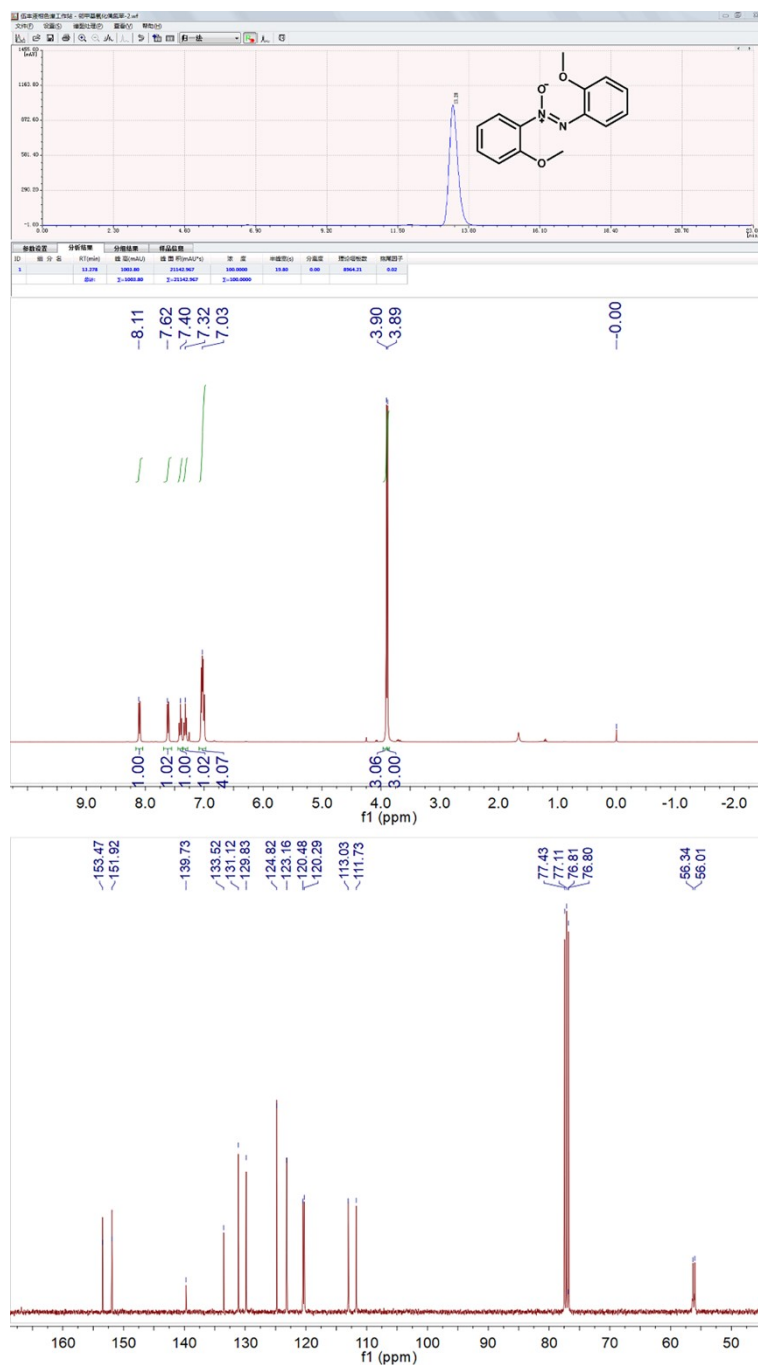

Fig. S16 HPLC chromatogram,  $^1\text{H}$  NMR and  $^{13}\text{C}$  NMR spectra of 2,2'-azoxyanisole.

**3,3'-Azoxytoluene:** Crude product was purified by recrystallization from ethanol.  $^1\text{H}$  NMR (400 MHz,  $\text{CDCl}_3$ )  $\delta$  2.41 (s, 3H), 2.43 (s, 3H), 7.17-7.19 (m, 1H), 7.30-7.37 (m, 3H), 7.96-7.98 (m, 2H), 8.06-8.09 (m, 2H);  $^{13}\text{C}$  NMR (100 MHz,  $\text{CDCl}_3$ )  $\delta$  21.47, 21.52, 119.54, 122.57, 122.81, 126.09, 128.54, 128.62, 130.42, 132.32, 138.47, 144.08, 148.43. HPLC analysis conditions: mobile phase:  $V_{\text{acetonitrile}}/V_{\text{H}_2\text{O}} = 7/3$ ; flow rate:  $0.5 \text{ mL min}^{-1}$ .

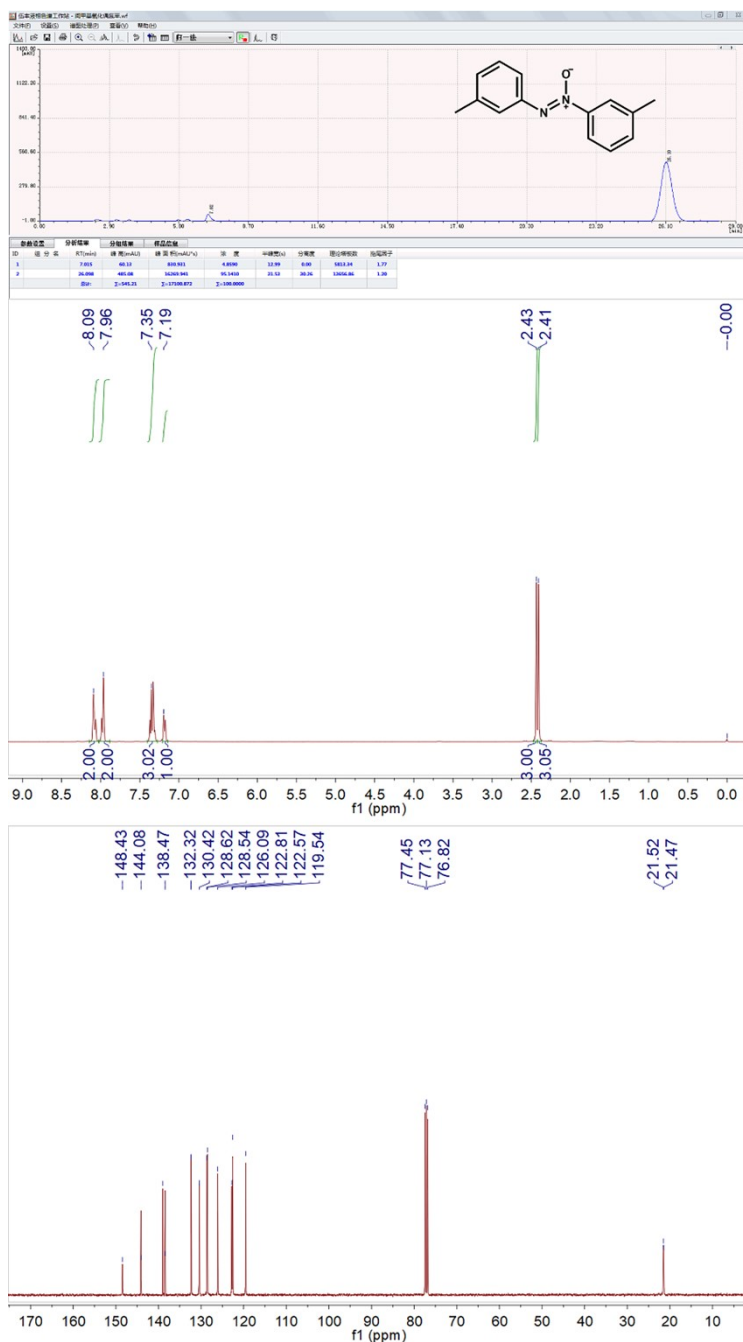

Fig. S17 HPLC chromatogram,  $^1\text{H}$  NMR and  $^{13}\text{C}$  NMR spectra of 3,3'-azoxytoluene.

**3,3'-Azoxychlorobenzene:** Crude product was purified by recrystallization from ethanol.  $^1\text{H}$  NMR (400 MHz,  $\text{CDCl}_3$ )  $\delta$  7.35-7.54 (m, 4H), 7.99 (d, 1H), 8.19 (d, 1H), 8.24-8.29 (d, 2H);  $^{13}\text{C}$  NMR (100 MHz,  $\text{CDCl}_3$ )  $\delta$  120.63, 122.84, 124.12, 125.42, 129.75, 132.03, 134.42, 134.83, 144.53, 148.82. HPLC analysis conditions: mobile phase: acetonitrile; flow rate: 0.5 mL  $\text{min}^{-1}$ .

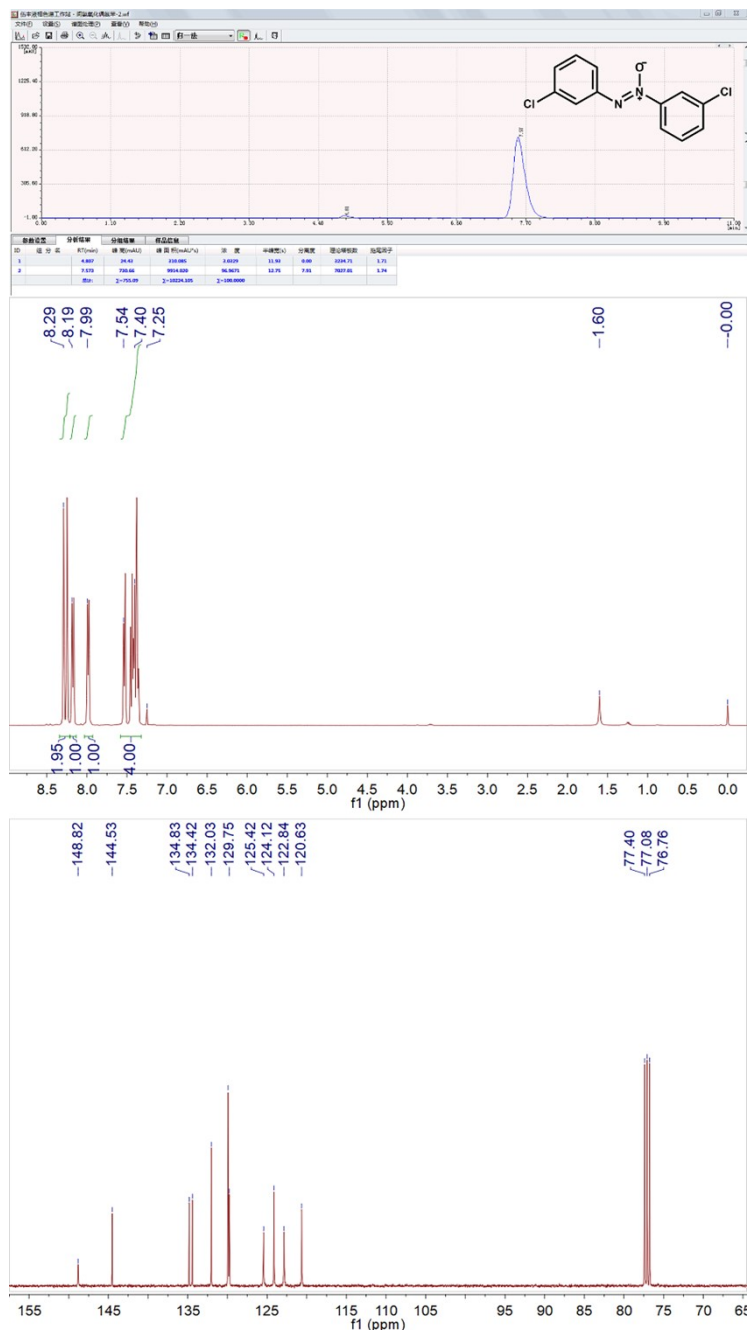

Fig. S18 HPLC chromatogram,  $^1\text{H}$  NMR and  $^{13}\text{C}$  NMR spectra of 3,3'-Azoxychlorobenzene.

**4,4'-Azoxytoluene:** Crude product was purified by recrystallization from ethanol.  $^1\text{H}$  NMR (400 MHz,  $\text{CDCl}_3$ )  $\delta$  2.41 (s, 3H), 2.44 (s, 3H), 7.27-7.30 (d, 4H), 8.10 (d, 2H), 8.17 (d, 2H);  $^{13}\text{C}$  NMR (100 MHz,  $\text{CDCl}_3$ )  $\delta$  16.06, 16.36, 116.90, 116.95, 120.45, 120.49, 124.04, 124.13, 134.80, 136.65, 136.71, 141.01. HPLC analysis conditions: mobile phase:  $V_{\text{acetonitrile}}/V_{\text{H}_2\text{O}}=7/3$ ; flow rate:  $0.5\text{ mL min}^{-1}$ .

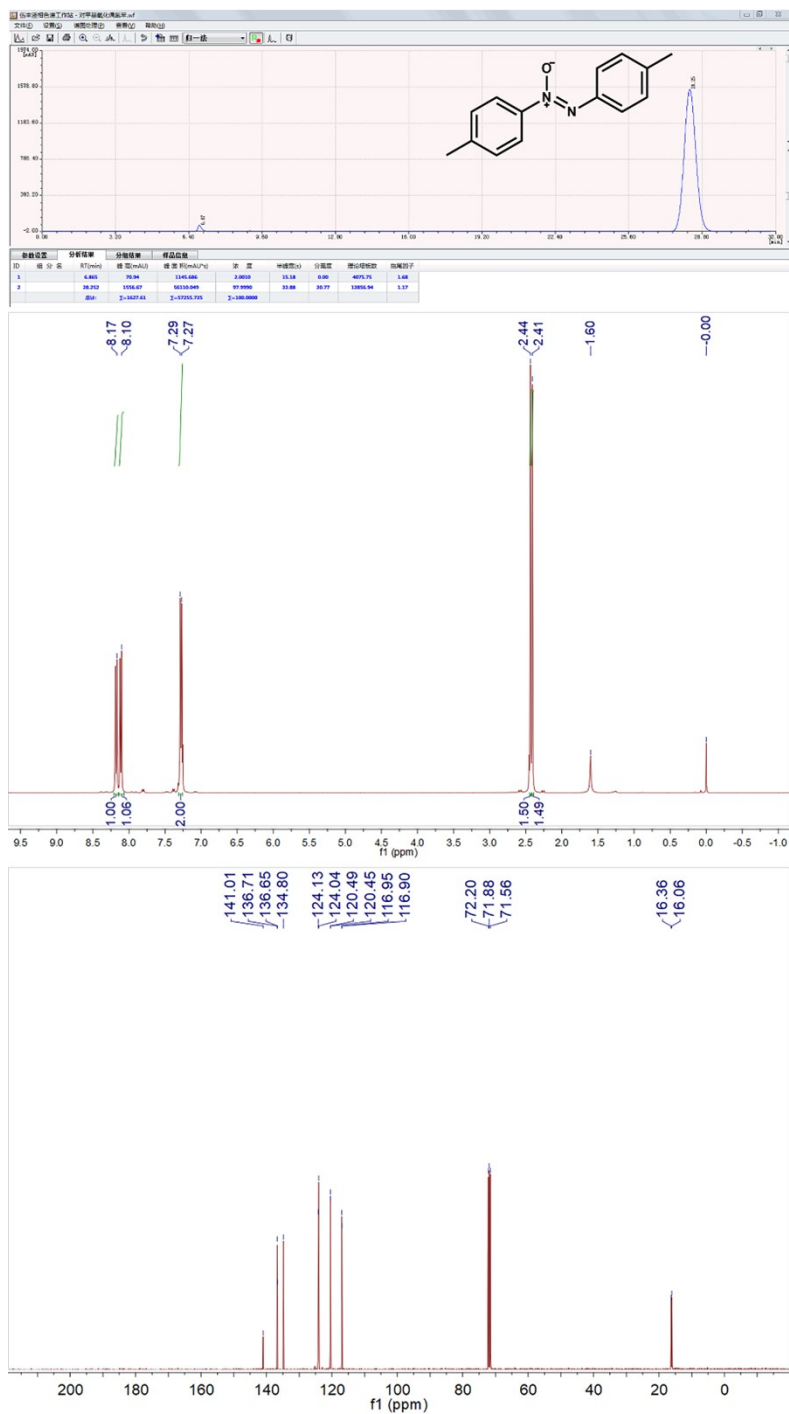

Fig. S19 HPLC chromatogram,  $^1\text{H}$  NMR and  $^{13}\text{C}$  NMR spectra of 4,4'-Azoxytoluene.

**4,4'-Azoxychlorobenzene:** Crude product was purified by recrystallization from ethanol.  $^1\text{H}$  NMR (400 MHz,  $\text{CDCl}_3$ )  $\delta$  7.40-7.52 (m, 4H), 8.14 (d, 2H), 8.23 (d, 2H);  $^{13}\text{C}$  NMR (100 MHz,  $\text{CDCl}_3$ )  $\delta$  123.69, 127.08, 128.95, 129.01, 135.25, 138.06, 142.19, 146.50. HPLC analysis conditions: mobile phase: acetonitrile; flow rate: 0.5 mL  $\text{min}^{-1}$ .

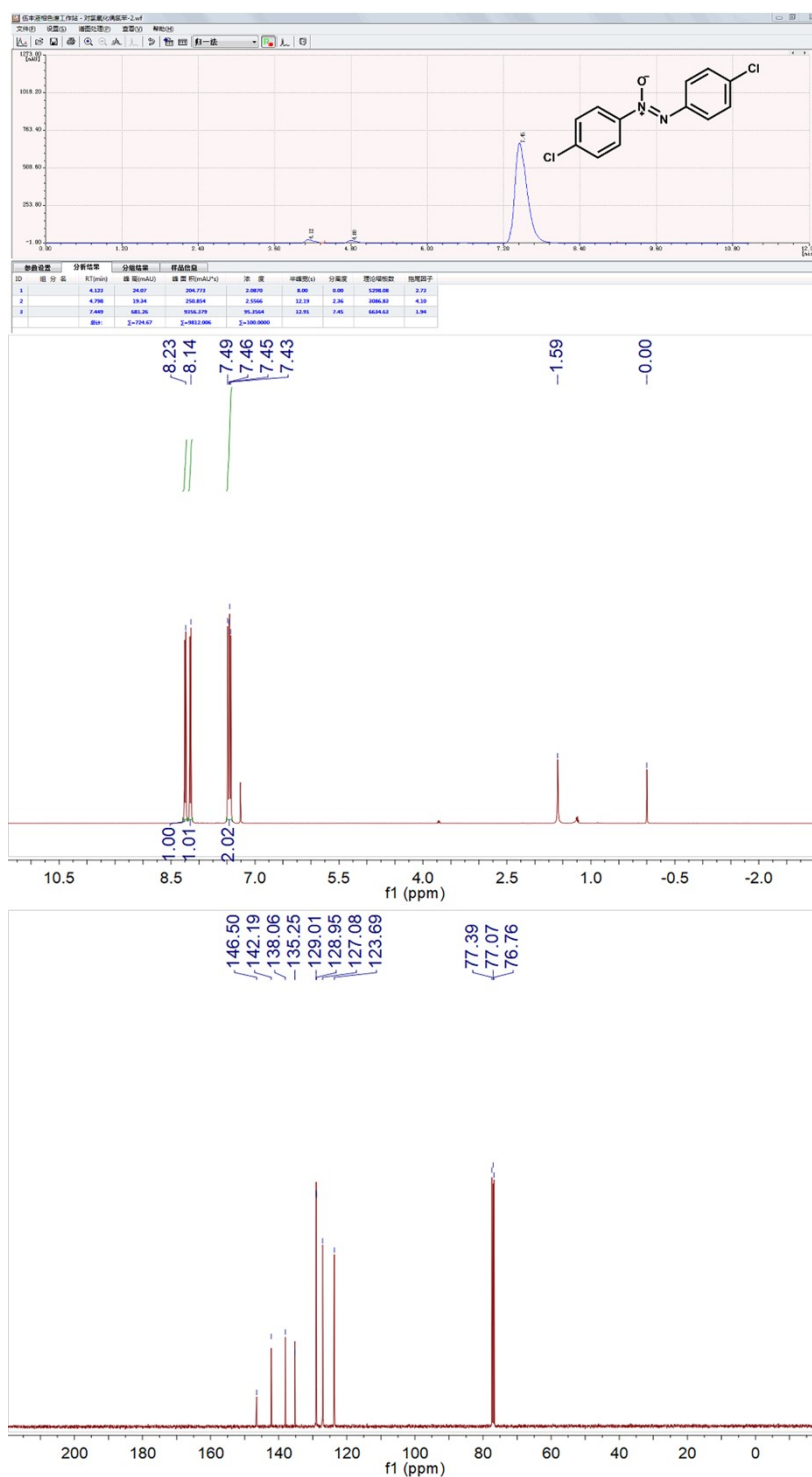

Fig. S20 HPLC chromatogram,  $^1\text{H}$  NMR and  $^{13}\text{C}$  NMR spectra of 4,4'-Azoxychlorobenzene.

**4,4'-bis(hydroxymethyl)azoxybenzene:** Crude product was purified by recrystallization from ethanol.  $^1\text{H}$  NMR (400 MHz,  $\text{DMSO-d}_6$ )  $\delta$  4.59 (s, 2H), 4.64 (s, 2H), 5.47 (s, 2H), 7.51 (d, 2H), 7.57 (d, 2H), 8.13 (d, 2H), 8.22 (d, 2H);  $^{13}\text{C}$  NMR (100 MHz,  $\text{DMSO-d}_6$ )  $\delta$  62.57, 62.97, 122.27, 125.50, 127.07, 127.21, 142.63, 145.15, 146.74, 147.53. HPLC analysis conditions: mobile phase: acetonitrile; flow rate: 0.5  $\text{mL min}^{-1}$ .

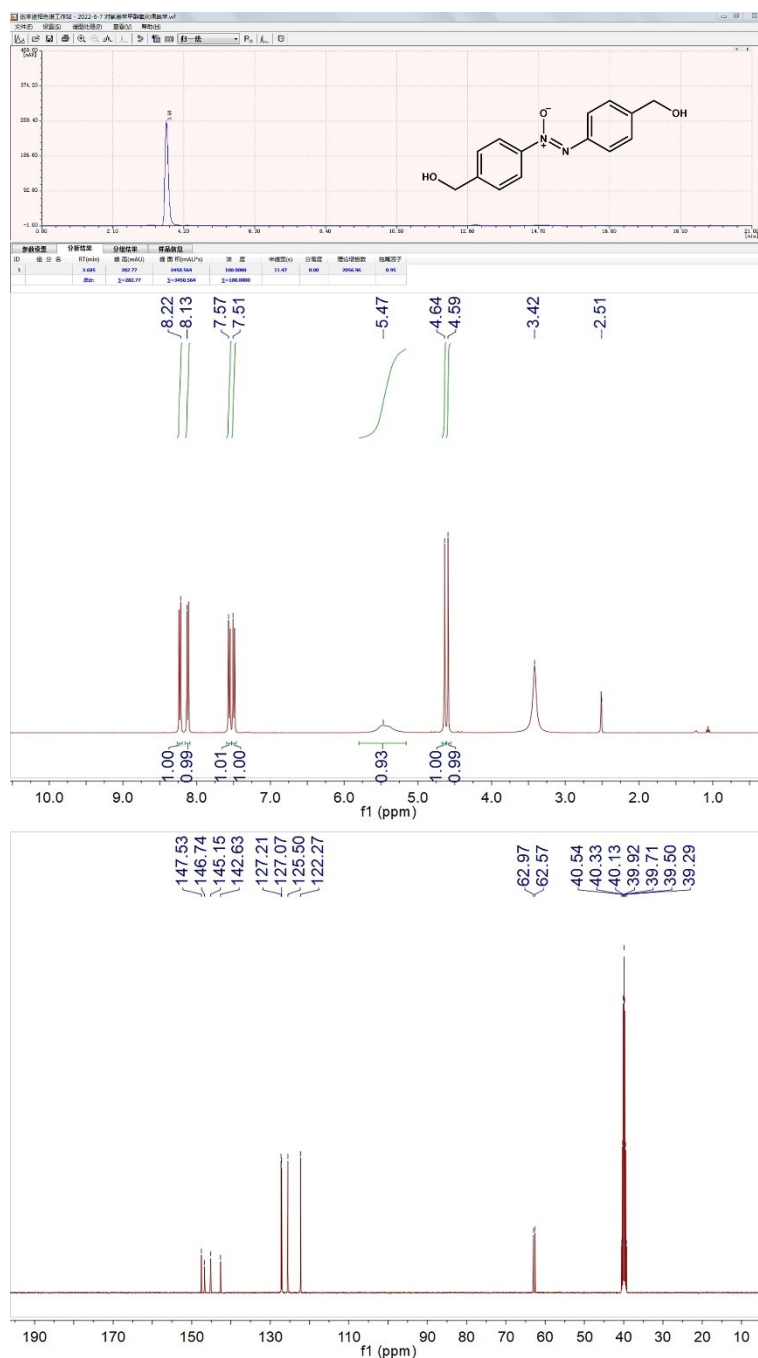

Fig. S21 HPLC chromatogram,  $^1\text{H}$  NMR and  $^{13}\text{C}$  NMR spectra of 4,4'-bis(hydroxymethyl)azoxybenzene.

1,2-Di(pyridine-3-yl)diazene oxide: Crude product was purified by recrystallization from ethanol.  $^1\text{H}$  NMR (400 MHz,  $\text{DMSO-d}_6$ )  $\delta$  7.59 (m, 1H), 7.70 (m, 1H), 8.63 (m, 3H), 8.87 (m, 1H), 9.16 (d, 1H), 9.44 (d, 1H);  $^{13}\text{C}$  NMR (100 MHz,  $\text{DMSO-d}_6$ )  $\delta$  124.43, 124.69, 130.65, 140.01, 143.96, 144.15, 147.38, 150.85, 153.69. HPLC analysis conditions: mobile phase: acetonitrile; flow rate:  $0.5\text{ mL min}^{-1}$ .

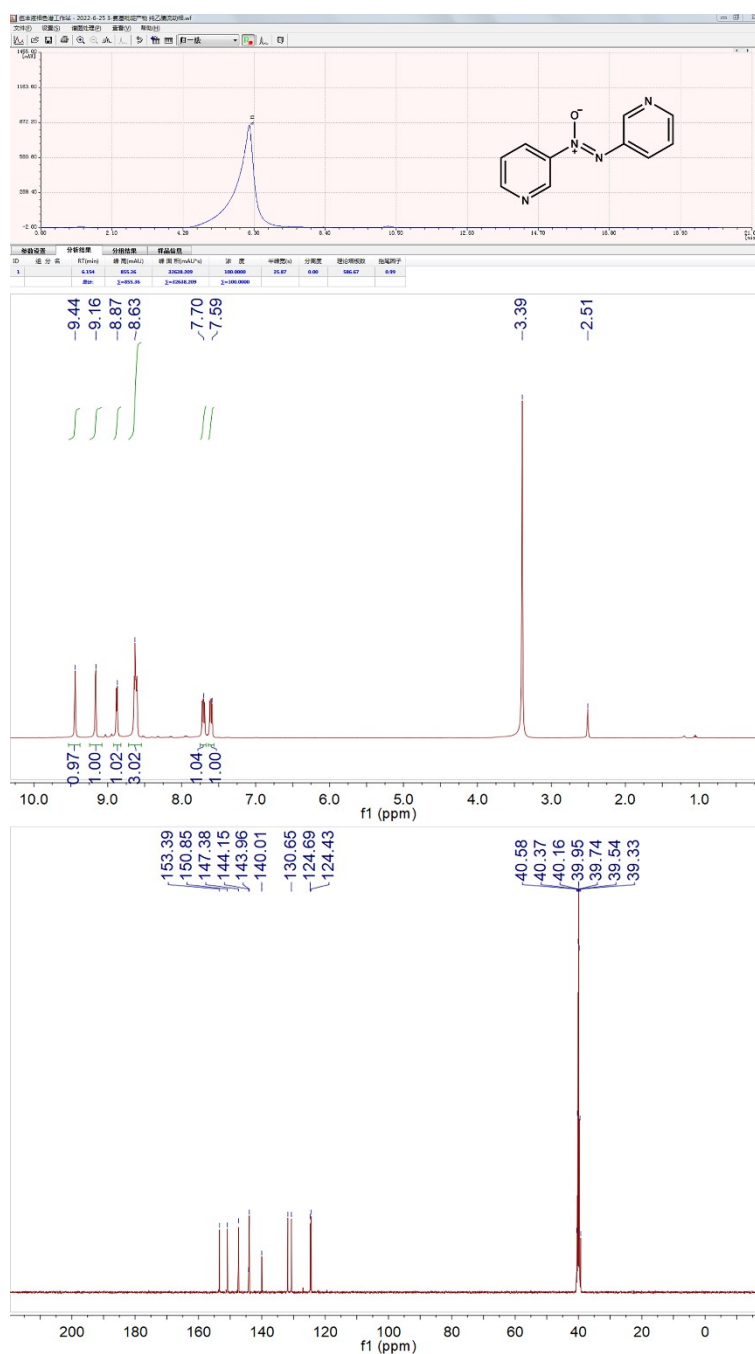

Fig. S22. HPLC chromatogram,  $^1\text{H}$  NMR and  $^{13}\text{C}$  NMR spectra of 1,2-Di(pyridine-3-yl)diazene oxide.



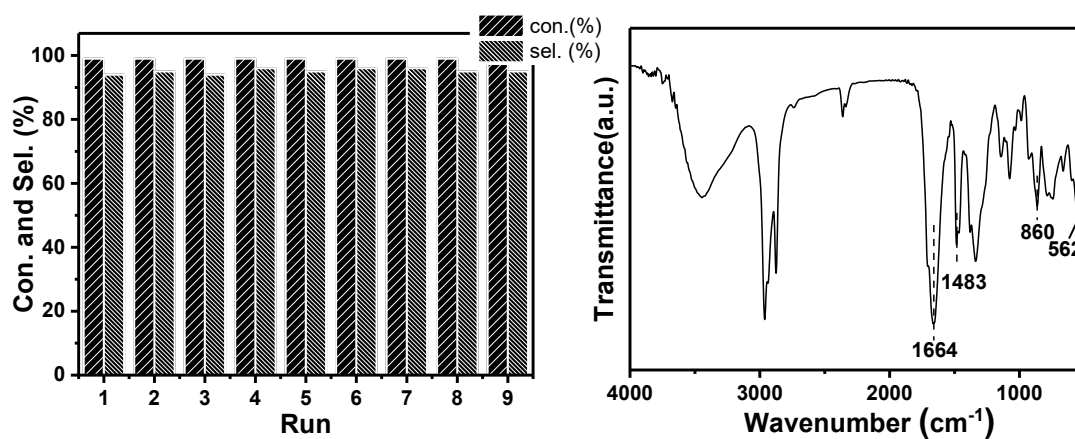

Fig. S23 Left: Recyclability of TBA<sub>6</sub>-Nb for oxidative coupling of aniline. Reaction conditions: 10 mmol aniline, 0.2 g TBA<sub>6</sub>-Nb, 1.5 equiv H<sub>2</sub>O<sub>2</sub>, 30 °C, 5 h, 10 mL ethanol. Right: FT-IR spectra of the reused TBA<sub>6</sub>-Nb.

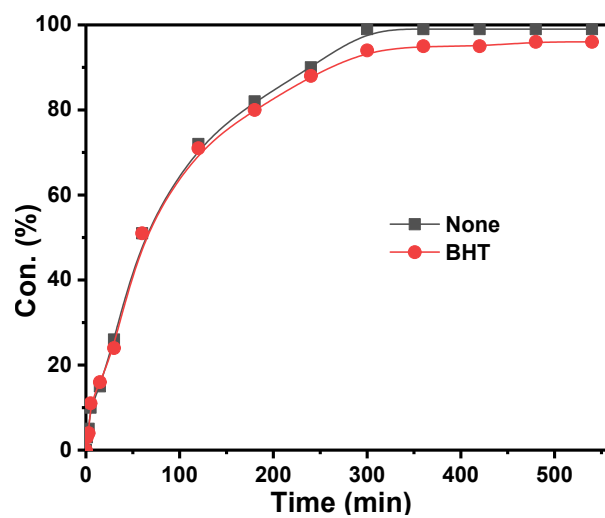

Fig. S24 Time profile of the oxidative coupling of aniline in the presence of and without adding BHT as radical scavenger. Reaction conditions: 10 mmol aniline, 10 mL ethanol,  $7.8 \times 10^{-3}$  mol% TBA<sub>6</sub>-Nb, 1.5 equiv H<sub>2</sub>O<sub>2</sub>, 30 °C.

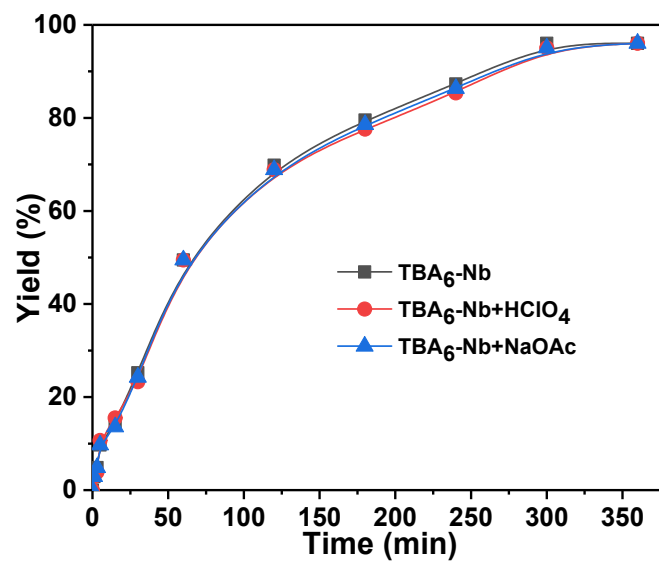

Fig. S25 Time profile of the oxidative coupling of aniline in the presence of additives. Reaction conditions: 10 mmol aniline, 10 mL ethanol,  $7.8 \times 10^{-3}$  mol% TBA<sub>6</sub>-Nb, 1.5 equiv H<sub>2</sub>O<sub>2</sub>, 30 °C,  $n_{\text{HClO}_4}/n_{\text{Nb}}=1.2/1$  or  $n_{\text{NaOAc}}/n_{\text{Nb}}=1.2/1$ .

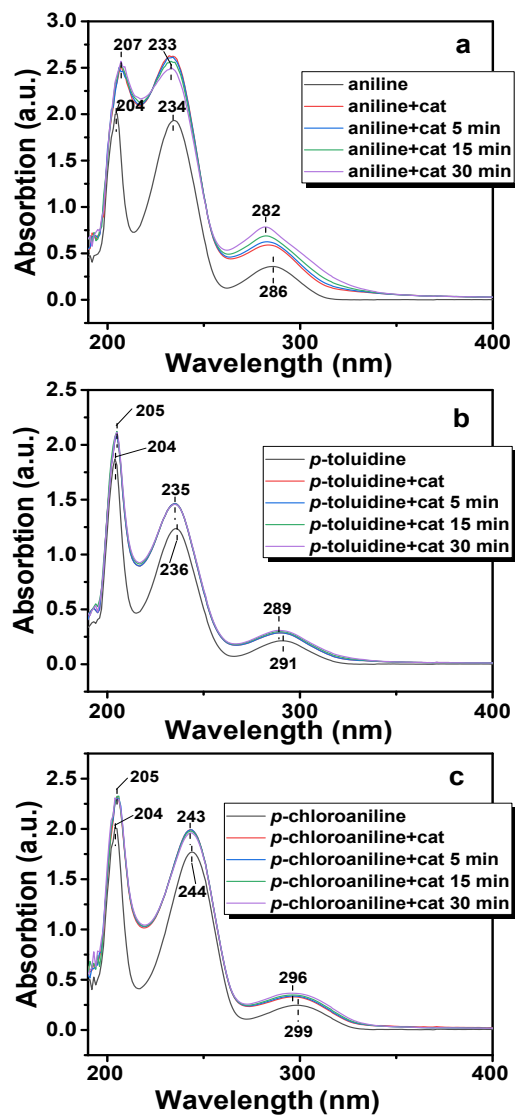

Fig. S26 UV-vis spectra of aniline, *p*-toluidine and *p*-chloroaniline in ethanol ( $5 \times 10^{-4}$  mol/L) with TBA<sub>6</sub>-Nb catalyst. Cat. refers to the TBA<sub>6</sub>-Nb ( $7.8 \times 10^{-3}$  mol%).

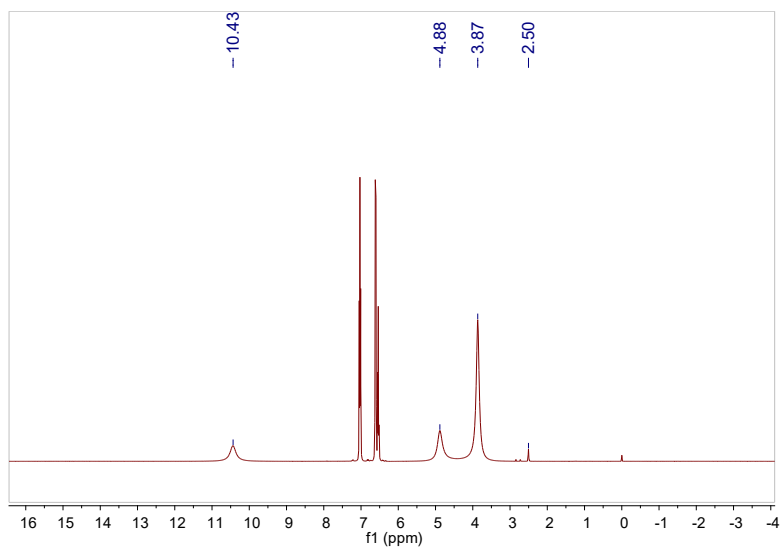

Fig. S27  $^1\text{H}$  NMR spectra of aniline in the presence of  $\text{H}_2\text{O}_2$  in  $\text{DMSO-}d_6$ .

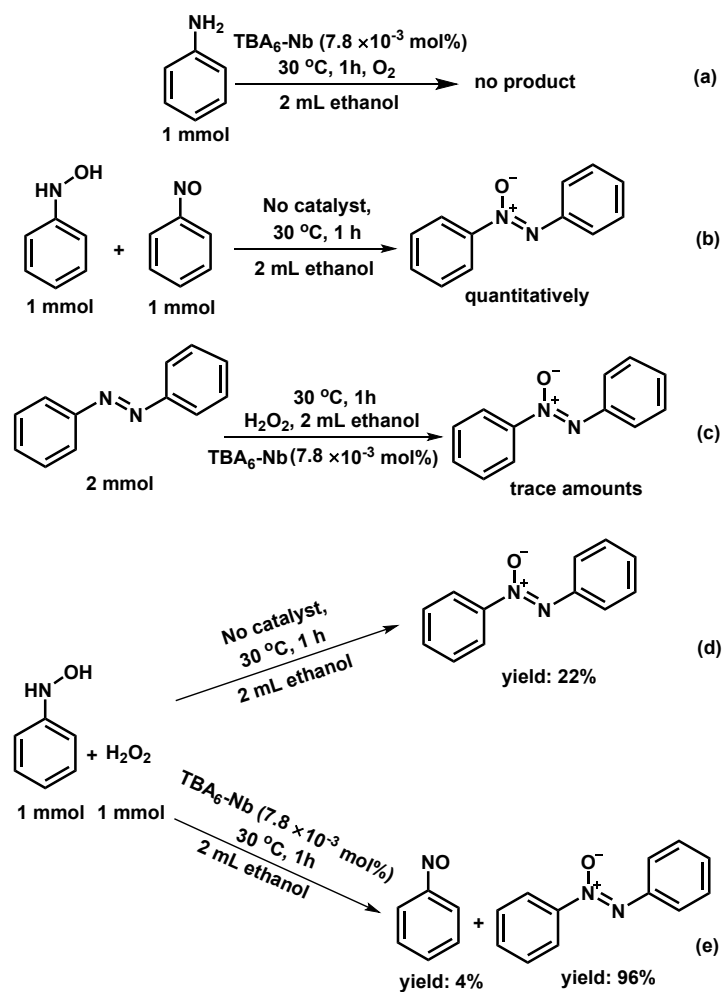

Scheme S2 Control experiments.

## Reference

- 1 W. Ma, H. Yuan, H. Wang, Q. Zhou, K. Kong, D. Li, Y. Yao and Z. Hou, *ACS Catal.*, 2018, **8**, 4645-4659.
- 2 H. Tumma, N. Nagaraju and K. V. Reddy, *Appl. Catal. A-Gen.*, 2009, **353**, 54-60.
- 3 L. Yang, G. Shi, X. Ke, R. Shen and L. Zhang, *CrystEngComm*, 2014, **16**, 1620-1624.
- 4 S. Gontier and A. Tuel, *Appl. Catal. A-Gen.*, 1994, **118**, 173-186.
- 5 D. R. Das and A. K. Talukdar, *ChemistrySelect*, 2017, **2**, 8983-8989.
- 6 S. Gontier and A. Tuel, *J. Catal.*, 1995, **157**, 124-132.
- 7 C.-F. Chang and S.-T. Liu, *J. Mol. Catal. A-Chem.*, 2009, **299**, 121-126.
- 8 S. S. Acharyya, S. Ghosh and R. Bal, *ACS Sustain. Chem. Eng.*, 2014, **2**, 584-589.
- 9 S. Ghosh, S. S. Acharyya, T. Sasaki and R. Bal, *Green Chem.*, 2015, **17**, 1867-1876.
- 10 A. Shukla, R. K. Singha, L. S. Konathala, T. Sasaki and R. Bal, *RSC Adv.*, 2016, **6**, 22812-22820.
- 11 G. S. de Carvalho, L. H. Chagas, C. G. Fonseca, P. P. De Castro, A. C. Sant, A. A. Leitão and G. W. Amarante, *New J. Chem.*, 2019, **43**, 5863.
- 12 S. Han, Y. Cheng, S. Liu, C. Tao, A. Wang, W. Wei, H. Yu and Y. Wei, *Angew. Chem. Int. Ed.*, 2021, **60**, 6382-6385.
- 13 J. Qin, Y. Long, F. Sun, P.-P. Zhou, W. D. Wang, N. Luo and J. Ma, *Angew. Chem. Int. Ed.*, 2022, **61**, e202112907.
- 14 A. L. Lima, D. C. Batalha, H. V. Fajardo, J. L. Rodrigues, M. C. Pereira and A. C. Silva, *Catal. Today*, 2018, **344**, 118-123.
- 15 Y. Tao, B. Singh, V. Jindal, Z. Tang and P. P. Pescarmona, *Green Chem.*, 2019, **21**, 5852-5864.
